# Supplementary material for: Prognostic clinicopathologic factors in carcinoma of unknown primary origin: a study of 106 consecutive cases
Source: PubMed Central journal article supplement (PMC5617535; doi:10.18632/oncotarget.16021), 2017-03-08
Supplement: oncotarget-08-62630-s001.pdf [file oncotarget-08-62630-s001.pdf]

# Prognostic clinicopathologic factors in carcinoma of unknown primary origin: a study of 106 consecutive cases

## Supplementary Material

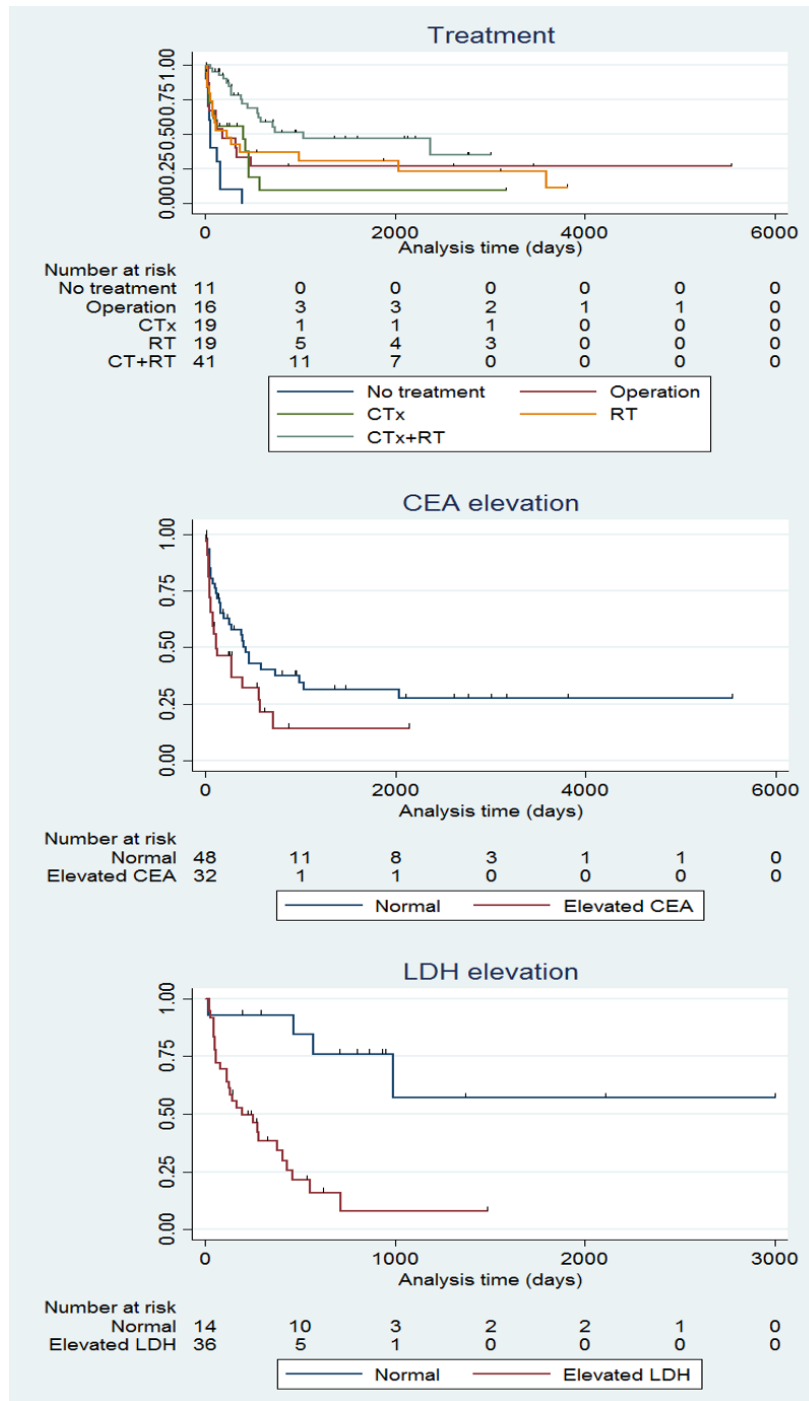

Supplementary Figure 1: Factors related with shorter overall survival was patients with no treatment ( $P < 0.001$ ), increased CEA ( $P = 0.047$ ), and increased lactate dehydrogenase (LDH,  $P < 0.001$ ).

**Supplementary Table 1.**

| <b>Antibody</b> | <b>Industry</b> | <b>Catalog number</b> | <b>Dilution rate</b> |
|-----------------|-----------------|-----------------------|----------------------|
| CK (AE1/AE3)    | DAKO            | M3515                 | 1:50                 |
| S-100 protein   | DAKO            | Z0311                 | 1:400                |
| HMB45           | DAKO            | M0634                 | 1:50                 |
| CD45            | DAKO            | M0701                 | 1:100                |
| CK7             | DAKO            | M7018                 | 1:100                |
| CK20            | DAKO            | M7019                 | 1:50                 |
| CDX-2           | Cell marque     | 235R-16               | 1:400                |
| Synaptophysin   | DAKO            | M7315                 | 1:900                |
| Chromogranin    | DAKO            | M0869                 | 1:500                |
| CD56            | NOVOCASTRA      | NCL-L-CD56-504        | 1:100                |
